# Supplementary material for: Trajectory planning for uncrewed combat aircraft penetration with dynamic radar cross section constraint
Source: PeerJ journal article supplement (doi:10.7717/peerj-cs.3444), 2025-12-18
Supplement: dataset_main1.xlsx [file dataset_main1.xlsx]

## Sheet: Sheet1
main1_data	x	y	z	V	phi0	theta0
UAV	5	12	0	220	0	0
	x	y	z
Target position	47	36	0
Radar position	23	39	0
