# Supplementary material for: Trajectory planning for uncrewed combat aircraft penetration with dynamic radar cross section constraint
Source: PeerJ journal article supplement (doi:10.7717/peerj-cs.3444), 2025-12-18
Supplement: dataset_main2.xlsx [file dataset_main2.xlsx]

## Sheet: Sheet1
main2_data	x(Km)	y(Km)	z(Km)	V(Km/h)	phi0	theta0
UAV	5	12	0	220	0	0
	x(Km)	y(Km)	z(Km)
Target position	50	55	0
Radar position1	15	31	0
Radar position2	56	27	0
Radar position3	34	60	0
