# Supplementary material for: Trajectory planning for uncrewed combat aircraft penetration with dynamic radar cross section constraint
Source: PeerJ journal article supplement (doi:10.7717/peerj-cs.3444), 2025-12-18
Supplement: dataset_main3.xlsx [file dataset_main3.xlsx]

## Sheet: Sheet1
main3_data	x(Km)	y(Km)	z(Km)	V(Km/h)	phi0	theta0
UAV	8	6	0	220	0	0
	x(Km)	y(Km)	z(Km)
Target position	47	50	0
Radar position1	18	20	0
Radar position2	44	22	0
Radar position3	15	60	0
Radar position4	38	42	0
Radar position5	30	5	0
